# Supplementary material
Source: ML conference proceedings conference paper supplement (https://openaccess.thecvf.com/content/CVPR2023/html/Miles_MobileVOS_Real-Time_Video_CVPR_2023_paper.html)
Supplement: Supplementary file 2 [file Miles_MobileVOS_Real-Time_Video_CVPR_2023_supplemental.zip]

Archive with 3 entries (3 files):
- MobileVOS_Supplementary/InPainting.mp4
- MobileVOS_Supplementary/OnDeviceOcclusion.mp4
- MobileVOS_Supplementary/supplementary.pdf
